# Supplementary material
Source: ML conference proceedings conference paper supplement (https://proceedings.neurips.cc/paper_files/paper/2018/hash/84438b7aae55a0638073ef798e50b4ef-Abstract.html)
Supplement: Supplementary file [file 84438b7aae55a0638073ef798e50b4ef-Supplemental.zip]

## 1 A Network architecture & training details

2 **Human face translation** The network architecture used for image translation between *sketch*,  
3 *photo* and *paint* is given in Table A.

4 Encoder/Decoder utilizes either convolutional layer or transposed convolutional layer, and Discrimi-  
5 nator utilizes convolutional layer or fully connected layer (FC). We note that the domain vector  $v$  is a  
6 3 dimensional one-hot vector combined with a 4 dimensional binary vector (2 binary bits for each  
7 attribute) for the attribute of interest. (7 dimensions in total)

8 During training, we employ ADAM optimizer with  $\beta_1 = 0.5$  and  $\beta_2 = 0.99$ . The learning rate is  
9 set as  $1e - 4$ , and the batch size is set as 96 (32 from each domain). We apply WGAN-GP as our  
10 pixel space discriminator. The weight for the objective in Equation 6 is set as follow:  $2e - 4$  for  
11  $KL$  divergence in  $\mathcal{L}_{vae}$ , 0.01 for  $\mathcal{L}_G^{adv}$  and  $\mathcal{L}_{cls}$ , and 1 for others.  $KL$  divergence is ignored in the  
12 experiment of Table 2 since generating unseen samples is not necessary.

Table A: The network architecture of UFDN for *sketch*, *photo* and *paint*.

| Encoder         |         |             |        |            |            |
|-----------------|---------|-------------|--------|------------|------------|
| Input : 64x64x3 |         |             |        |            |            |
| Layer           | Filters | Kernel size | Stride | BatchNorm. | Activation |
| 1               | 64      | 4x4         | 2      | ✓          | Leaky ReLU |
| 2               | 128     | 4x4         | 2      | ✓          | Leaky ReLU |
| 3               | 256     | 4x4         | 2      | ✓          | Leaky ReLU |
| 4               | 512     | 4x4         | 2      | ✓          | Leaky ReLU |
| 5               | 1024    | 4x4         | 2      | ✓          | Leaky ReLU |
| $\mu$           | 1024    | 4x4         | 2      | -          | -          |
| Generator       |         |             |        |            |            |
| Input : 1024+7  |         |             |        |            |            |
| Layer           | Filters | Kernel size | Stride | BatchNorm. | Activation |
| 1               | 1024    | 4x4         | 2      | ✓          | Leaky ReLU |
| 2               | 512     | 4x4         | 2      | ✓          | Leaky ReLU |
| 3               | 256     | 4x4         | 2      | ✓          | Leaky ReLU |
| 4               | 128     | 4x4         | 2      | ✓          | Leaky ReLU |
| 5               | 64      | 4x4         | 2      | ✓          | Leaky ReLU |
| 6               | 3       | 4x4         | 2      | -          | Tanh       |
| Discriminator   |         |             |        |            |            |
| Input : 64x64x3 |         |             |        |            |            |
| Layer           | Filters | Kernel size | Stride | BatchNorm. | Activation |
| 1               | 16      | 4x4         | 2      | -          | Leaky ReLU |
| 2               | 32      | 4x4         | 2      | -          | Leaky ReLU |
| 3               | 64      | 4x4         | 2      | -          | Leaky ReLU |
| 4               | 128     | 4x4         | 2      | -          | Leaky ReLU |
| 5 (FC)          | 512     | -           | -      | -          | Leaky ReLU |
| 6 (FC)          | [1,7]   | -           | -      | -          | -          |

13 **UDA on digits** The network architecture and training hyper-parameters used for  $MNIST \rightarrow USPS$   
14 and  $USPS \rightarrow MNIST$  are identical as illustrated in Table B.

15 Encoder/Decoder uses convolutional layer/transposed convolutional layer. The digit classifier is a  
16 single layer fully-connected network which is jointly learned with our UFDN (only labels in source  
17 domain). We note that the domain vector  $v$  is a 2 dimensional one-hot vector. we employ ADAM  
18 optimizer with  $\beta_1 = 0.5$  and  $\beta_2 = 0.99$ . The learning rate is set as  $1e - 4$ , and the batch size is set as  
19 32 (16 from each domain).

20 The weight for the objective in Equation 6 is set as follow:  $1e - 7$  for  $KL$  divergence in  $\mathcal{L}_{vae}$ , 0.1 for  
21  $\mathcal{L}_E^{adv}$  and 1 for others. In the task of UDA, we discover that the pixel space discriminator  $D_x$  is not  
22 necessary since we perform classification on domain-invariant representations instead of images.

23 The network architecture used for UDA on  $SVHN \rightarrow MNIST$  is given in Table C.

Table B: The network architecture of UFDN for  $MNIST \rightarrow USPS$  and  $USPS \rightarrow MNIST$ .

| <b>Encoder</b>          |         |             |        |            |            |
|-------------------------|---------|-------------|--------|------------|------------|
| Input : 32x32x3         |         |             |        |            |            |
| Layer                   | Filters | Kernel size | Stride | BatchNorm. | Activation |
| 1                       | 64      | 4x4         | 2      | ✓          | Leaky ReLU |
| 2                       | 128     | 4x4         | 2      | ✓          | Leaky ReLU |
| 3                       | 256     | 4x4         | 2      | ✓          | Leaky ReLU |
| 4                       | 512     | 4x4         | 2      | ✓          | Leaky ReLU |
| $\mu$                   | 1024    | 4x4         | 2      | -          | -          |
| <b>Generator</b>        |         |             |        |            |            |
| Input : 64+2            |         |             |        |            |            |
| Layer                   | Filters | Kernel size | Stride | BatchNorm. | Activation |
| 1                       | 512     | 4x4         | 2      | ✓          | Leaky ReLU |
| 2                       | 256     | 4x4         | 2      | ✓          | Leaky ReLU |
| 3                       | 128     | 4x4         | 2      | ✓          | Leaky ReLU |
| 4                       | 64      | 4x4         | 2      | ✓          | Leaky ReLU |
| 5                       | 3       | 4x4         | 2      | -          | Tanh       |
| <b>Digit Classifier</b> |         |             |        |            |            |
| Input : 64              |         |             |        |            |            |
| Layer                   | Filters | Kernel size | Stride | BatchNorm. | Activation |
| 1 (FC)                  | 10      | -           | -      | -          | Soft-max   |

- 24 Encoder/Decoder utilizes either convolutional layer or transposed convolutional layer, and the  
 25 digit classifier is a single layer fully-connected network that is jointly learned with our UFDN (with  
 26 labels in source domain). We note that the domain vector  $v$  is a 2 dimensional one-hot vector.
- 27 During training, we employ ADAM optimizer with  $\beta_1 = 0.5$  and  $\beta_2 = 0.99$ . The learning rate is set  
 28 as  $1e - 4$ , and the batch size is set as 32 (16 from each domain).

Table C: The network architecture of UFDN for  $SVHN \rightarrow MNIST$ .

| <b>Encoder</b>          |         |             |        |            |            |
|-------------------------|---------|-------------|--------|------------|------------|
| Input : 32x32x3         |         |             |        |            |            |
| Layer                   | Filters | Kernel size | Stride | BatchNorm. | Activation |
| 1                       | 128     | 4x4         | 2      | ✓          | Leaky ReLU |
| 2                       | 256     | 4x4         | 2      | ✓          | Leaky ReLU |
| 3                       | 512     | 4x4         | 2      | ✓          | Leaky ReLU |
| 4                       | 1024    | 4x4         | 2      | ✓          | Leaky ReLU |
| $\mu$                   | 2048    | 4x4         | 2      | -          | -          |
| <b>Generator</b>        |         |             |        |            |            |
| Input : 2048+2          |         |             |        |            |            |
| Layer                   | Filters | Kernel size | Stride | BatchNorm. | Activation |
| 1                       | 1024    | 4x4         | 2      | ✓          | Leaky ReLU |
| 2                       | 512     | 4x4         | 2      | ✓          | Leaky ReLU |
| 3                       | 256     | 4x4         | 2      | ✓          | Leaky ReLU |
| 4                       | 128     | 4x4         | 2      | ✓          | Leaky ReLU |
| 5                       | 3       | 4x4         | 2      | -          | Tanh       |
| <b>Digit Classifier</b> |         |             |        |            |            |
| Input : 2048            |         |             |        |            |            |
| Layer                   | Filters | Kernel size | Stride | BatchNorm. | Activation |
| 1 (FC)                  | 10      | -           | -      | -          | Soft-max   |
